# Supplementary material for: Bibliographic revision of Mesacanthion Filipjev, 1927 (Nematoda: Thoracostomopsidae) with description of a new species from Jeju Island, South Korea
Source: PeerJ. 2019 Nov 18;7:e8023. doi: 10.7717/peerj.8023 (PMC6870531; doi:10.7717/peerj.8023)
Supplement: Table S1 — All values rounded. [file peerj-07-8023-s001.xlsx]

## Sheet: Sheet1
	males				females
Characters	holotype	paratype 1	paratype 2	paratype 3	allotype	paratype 1	paratype 2
		dried specimen				dried specimen
body length	3682	3495	2703	3723	4627	3449	3080
maximum body diameter	79	78	76	82	141	103	80
diameter at the level of cephalic setae	39	37	32	36	46	35	34
length of inner labial setae	12	12	11	15	13	11	11
length of outer labial setae	43	54	46	59	47	38	38
length of cephalic setae	28	31	18	34	24	25	26
distance from anterior to cephalic setae	19	14	11	17	21	14	13
width at cephalic capsule end	42	45	41	42	53	40	41
length of cephalic capsule	29	25	29	30	36	29	26
buccal cavity length	50	44	37	45	49	44	38
distance from nerve ring from anterior end	212	220	161	215	209	209	194
pharynx (oesophagus) length	731	732	598	764	715	715	687
corresponding body diameter at pharynx	76	78	75	74	122	93	76
cardia length	21	25	22	23	26	25	18
tail length	287	298	209	304	342	260	257
anal body diameter	50	60	52	53	71	56	48
c'	5.74	4.96667	4.01923	5.73585	4.8169	4.64286	5.35417
length of conical tail	223	229	157	226	273	203	205
length of cylindrical tail	64	69	52	78	69	57	52
cylindrical tail length portion as percentage of tail length	0.286996	0.30131	0.33121	0.345133	0.252747	0.280788	0.253659
spicule length as arc	76	85	72	84	n/a	n/a	n/a
spicule length as arc / anal body diameter	1.52	1.41667	1.38462	1.58491	n/a	n/a	n/a
length of gubernaculum	50	45	39	45	n/a	n/a	n/a
supplementary organ length	18	14	10	16	n/a	n/a	n/a
distance from cloacal opening to supplementary organ	165	171	136	169	n/a	n/a	n/a
distance from anterior end to vulva	n/a	n/a	n/a	n/a	2549	1847	1685
corresponding body diameter at vulva	n/a	n/a	n/a	n/a	141	103	80
distance from anterior end to vulva as percentage of total body length	n/a	n/a	n/a	n/a	55.0897	53.5518	54.7078
a	46.6076	44.8077	35.5658	45.4024	32.8156	33.4854	38.5
b	5.03694	4.77459	4.52007	4.87304	4.63627	4.82378	4.48326
c	12.8293	11.7282	12.933	12.2467	13.5292	13.2654	11.9844
							(when applicable µm)
